# Supplementary material for: Allele-specific analysis of cell fusion-mediated pluripotent reprograming reveals distinct and predictive susceptibilities of human X-linked genes to reactivation
Source: PubMed Central journal article supplement (PMC5264468; doi:10.1186/s13059-016-1136-4), 2017-01-25
Supplement: 13059_2016_1136_MOESM1_ESM.pdf [file 13059_2016_1136_MOESM1_ESM.pdf]

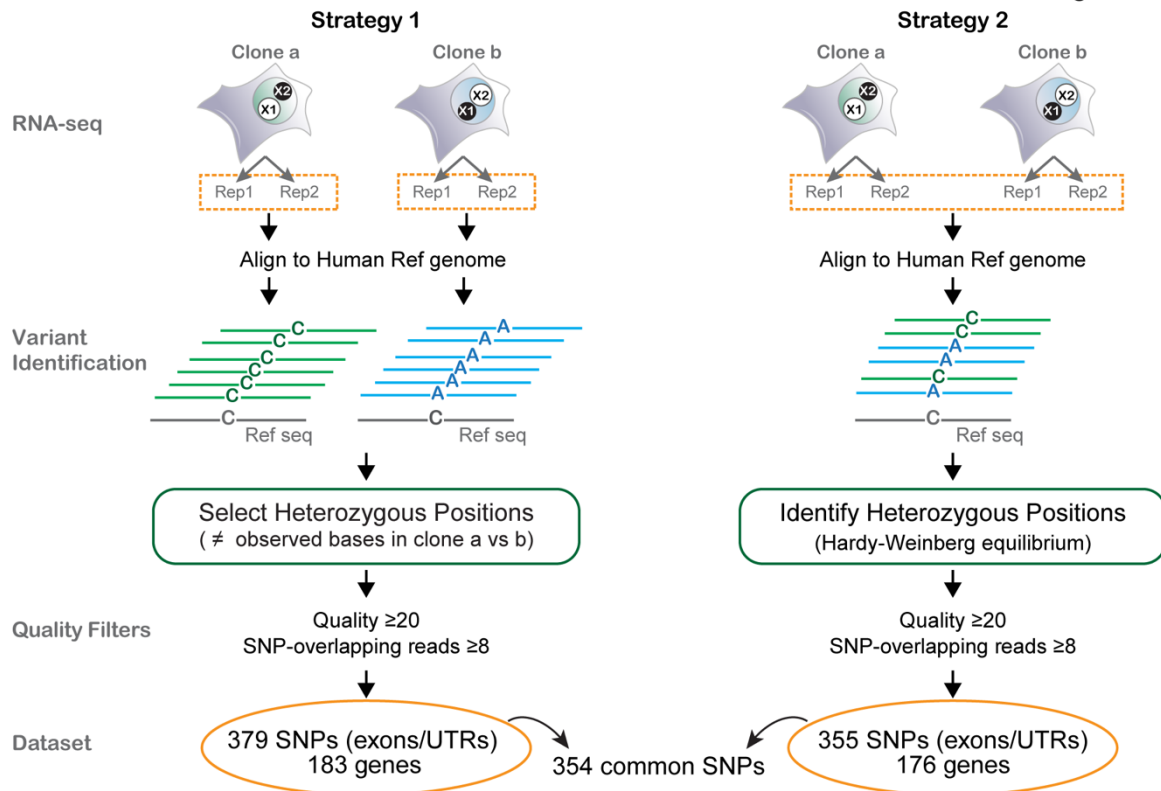

**Figure S1. RNA-sequencing strategies to identify heterozygous SNPs.** RNA-sequencing was performed using female hF clones in which reciprocal X chromosome pairs were active/inactive (e.g.  $X_1aX_2i$  and  $X_1iX_2a$  in clone types a and b, respectively). In the first strategy (strategy1) the reads from clone a (e.g. clone 11 and 12) and clone b (e.g. clone 27 and 34) were separately aligned to the reference genome sequence and those positions at which a different variant nucleotide was identified were considered heterozygous. In the second approach (strategy2) reads from both clones were merged before variant identification and processed as genomic DNA [1].

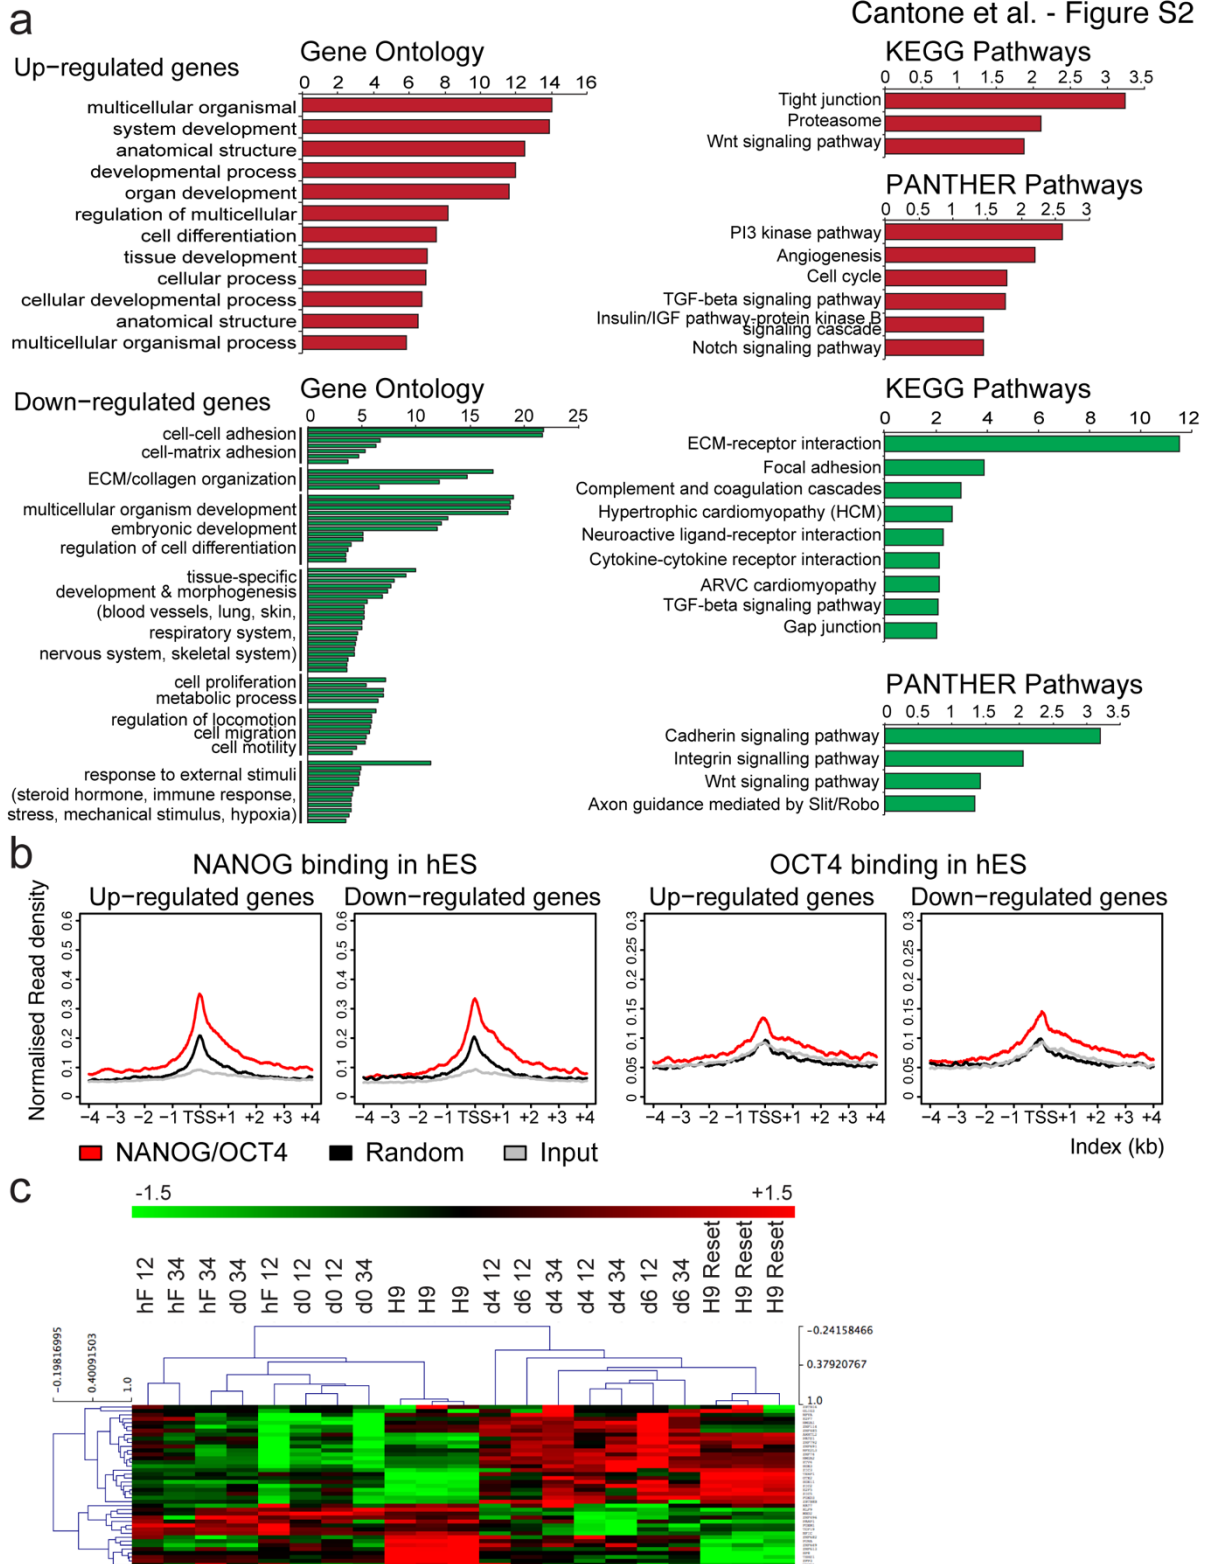

**Figure S2. Induction of a human pluripotency gene program in hF clones upon fusion with mouse ESCs. (a)** Functional enrichment analysis of Gene Ontology categories [2] for significantly up-regulated (red) and down-regulated (green) human genes in hFxmESC at day 4 and day6 versus day 0 (FDR <0.05; fold change  $\geq$  2). Graphs show the GO categories plotted against the p values (logarithmic

scale). **(b)** Enrichment of genes that are NANOG or OCT4 targets in human ESCs, and among genes that show differential expression in hFxmESC at days 4 and 6, versus day 0. Lines represent average OCT4 or NANOG immunoprecipitation (normalised read density in hESC) [3] within the set of differentially expressed genes (red), a random set of genes (black) or the input (grey). **(c)** Hierarchical clustering of genes that are up-regulated in hFxmESC but not in hESC (H9) and *vice versa* (black lines in figure 2b). H9 and H9 Reset represent primed and naïve hESC respectively, as described in [4]. Values correspond to the expression level (rlog, regularized logarithmic transformation) in each sample (hF clones 12 and 34; days 0, 4 and 6) scaled by the mean expression of each gene across samples.

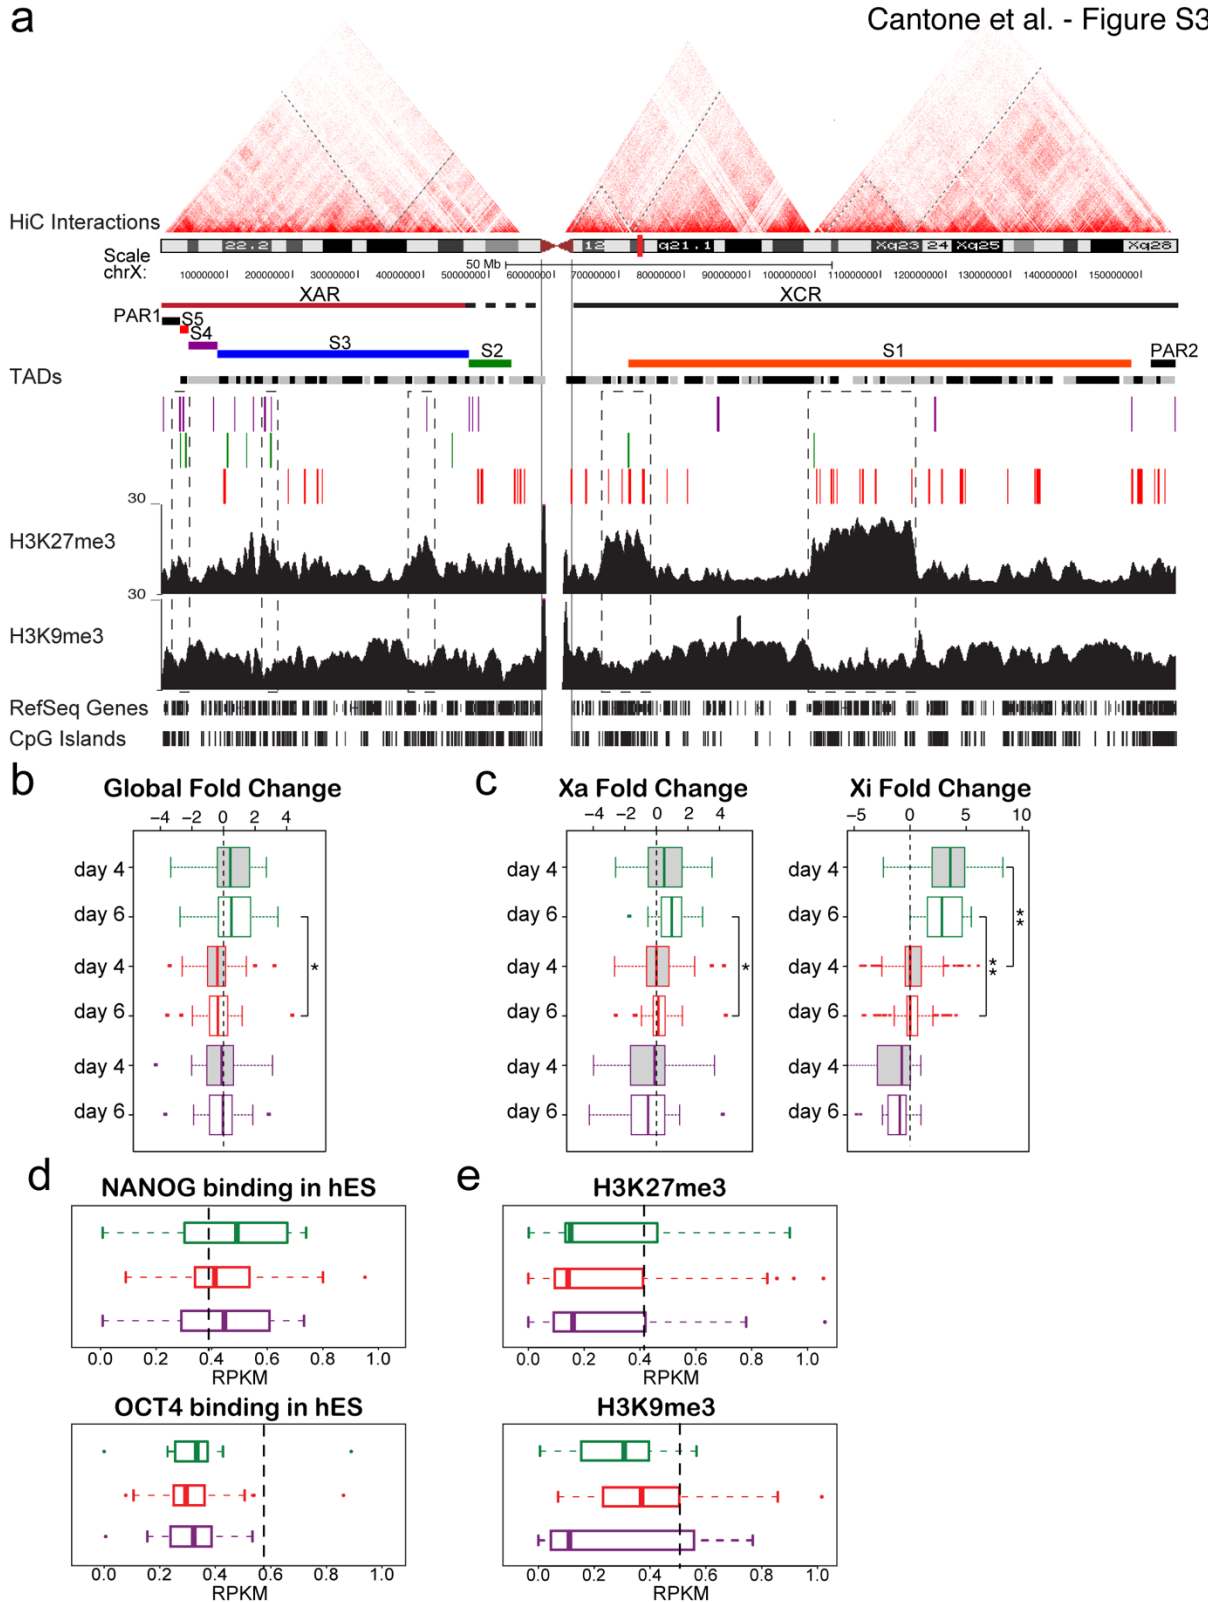

**Figure S3. Influence of local chromatin environment on the reactivation of human Xi genes upon pluripotent reprogramming.** (a) Schematic representation of the human X chromosome showing genetic and epigenetic features and the positions of genes that accordingly to RNA-seq in clone 12 and 34 have significant Xi expression across reprogramming (purple), are reactivated (green) or remain

inactive (red). TADs have been described previously [5] on the basis of HiC data. Regions showing different evolutionary conservation are represented as lines parallel to the X chromosome ideogram and are defined as in [6]: X Added Region (XAR), X Conserved Region (XCR), and evolutionary strata (PAR1, PAR2 and S1-5). H3K27me3 and H3K9me3 enrichment levels were defined using histone ChIP data from female human fibroblasts previously published in [7]. Reference gene sequences (RefSeq Genes) and CpG islands are obtained from the UCSC Genome Browser. **(b)-(e)** Box plots showing reactivated (green), stably active (purple) or inactive (red) genes. **(b)** Fold change difference between transcript levels in hFxmESC at day 4 (grey-filled boxes) and day 6 (white-filled boxes) versus day 0. Fold change was calculated from our RNA-seq dataset by edgeR and represents the average of 3-4 independent experiments in clone 12 and clone 34. Dashed lines indicate zero change. Asterisks mark significant differences among gene categories (\*)  $p < 0,05$  and (\*\*)  $p < 0.0005$  (Mann-Whitney U test). **(c)** Xa- and Xi-specific fold change was computed using allele-specific reads and is represented as described in (b). **(d)** NANOG and OCT4 binding at gene transcriptional start sites ( $\pm$  4kb) in male human ESC (H1) [3]. Dashed lines indicate mean X chromosome values. **(e)** H3K9me3 and H3K27me3 enrichment along the gene body. Data are represented as reads per kilobase per million (RPKM) obtained from published data of human fibroblasts [7]. Dashed lines indicate mean X chromosome values.

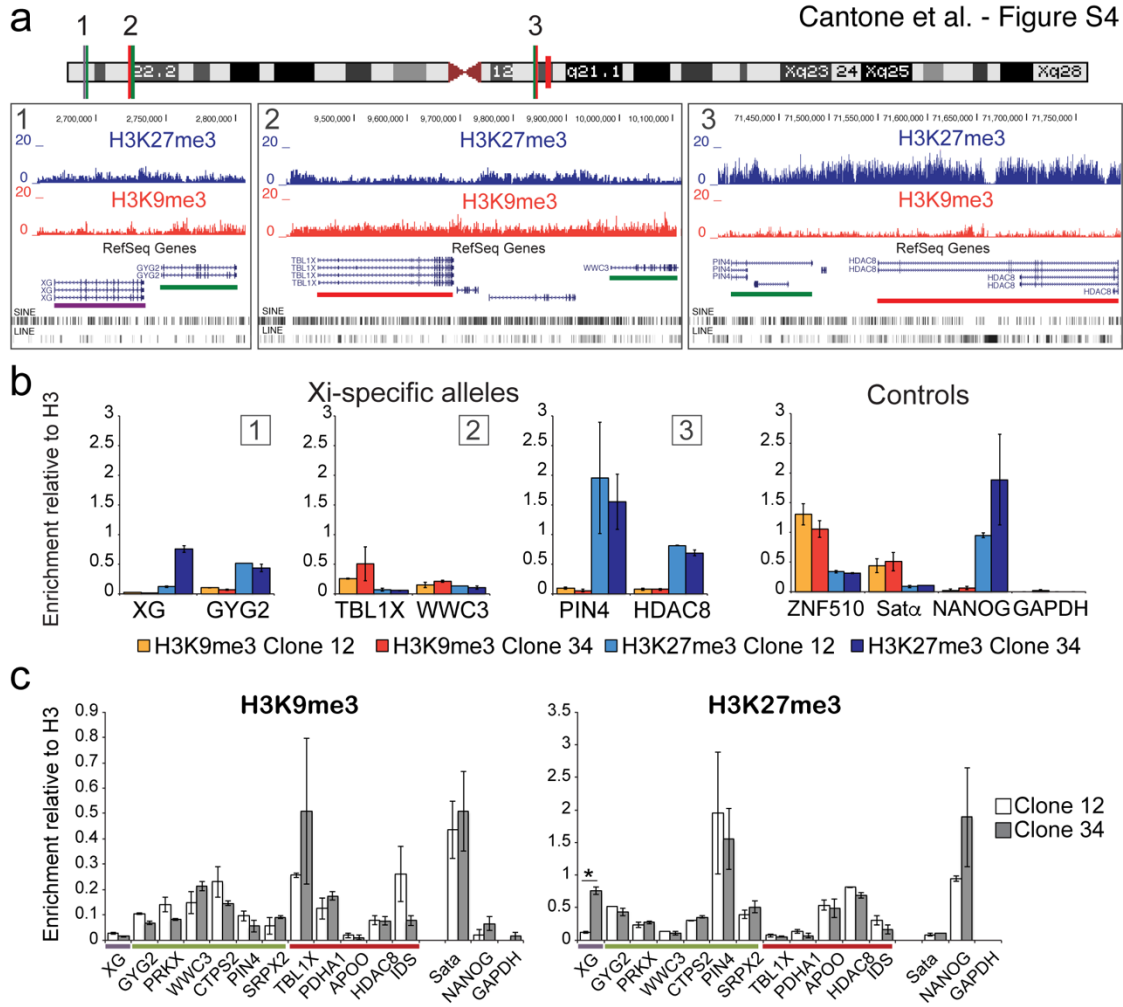

**Figure S4. Reactivated genes have similar H3K9me3 and H3K27me3 in expressing and non-expressing clones. (a)** Enrichment of H3K27me3 (blue) and H3K9me3 (orange) at three distinct X chromosome TADs (marked) neighboring genes with different status upon reprogramming: reactivated (green), active (purple) or inactive (red). **(b)-(c)** Xi-specific enrichment of H3K27me3 and H3K9me3 in hF clone 12 and 34. Data represent enrichment relative to H3 immunoprecipitation.

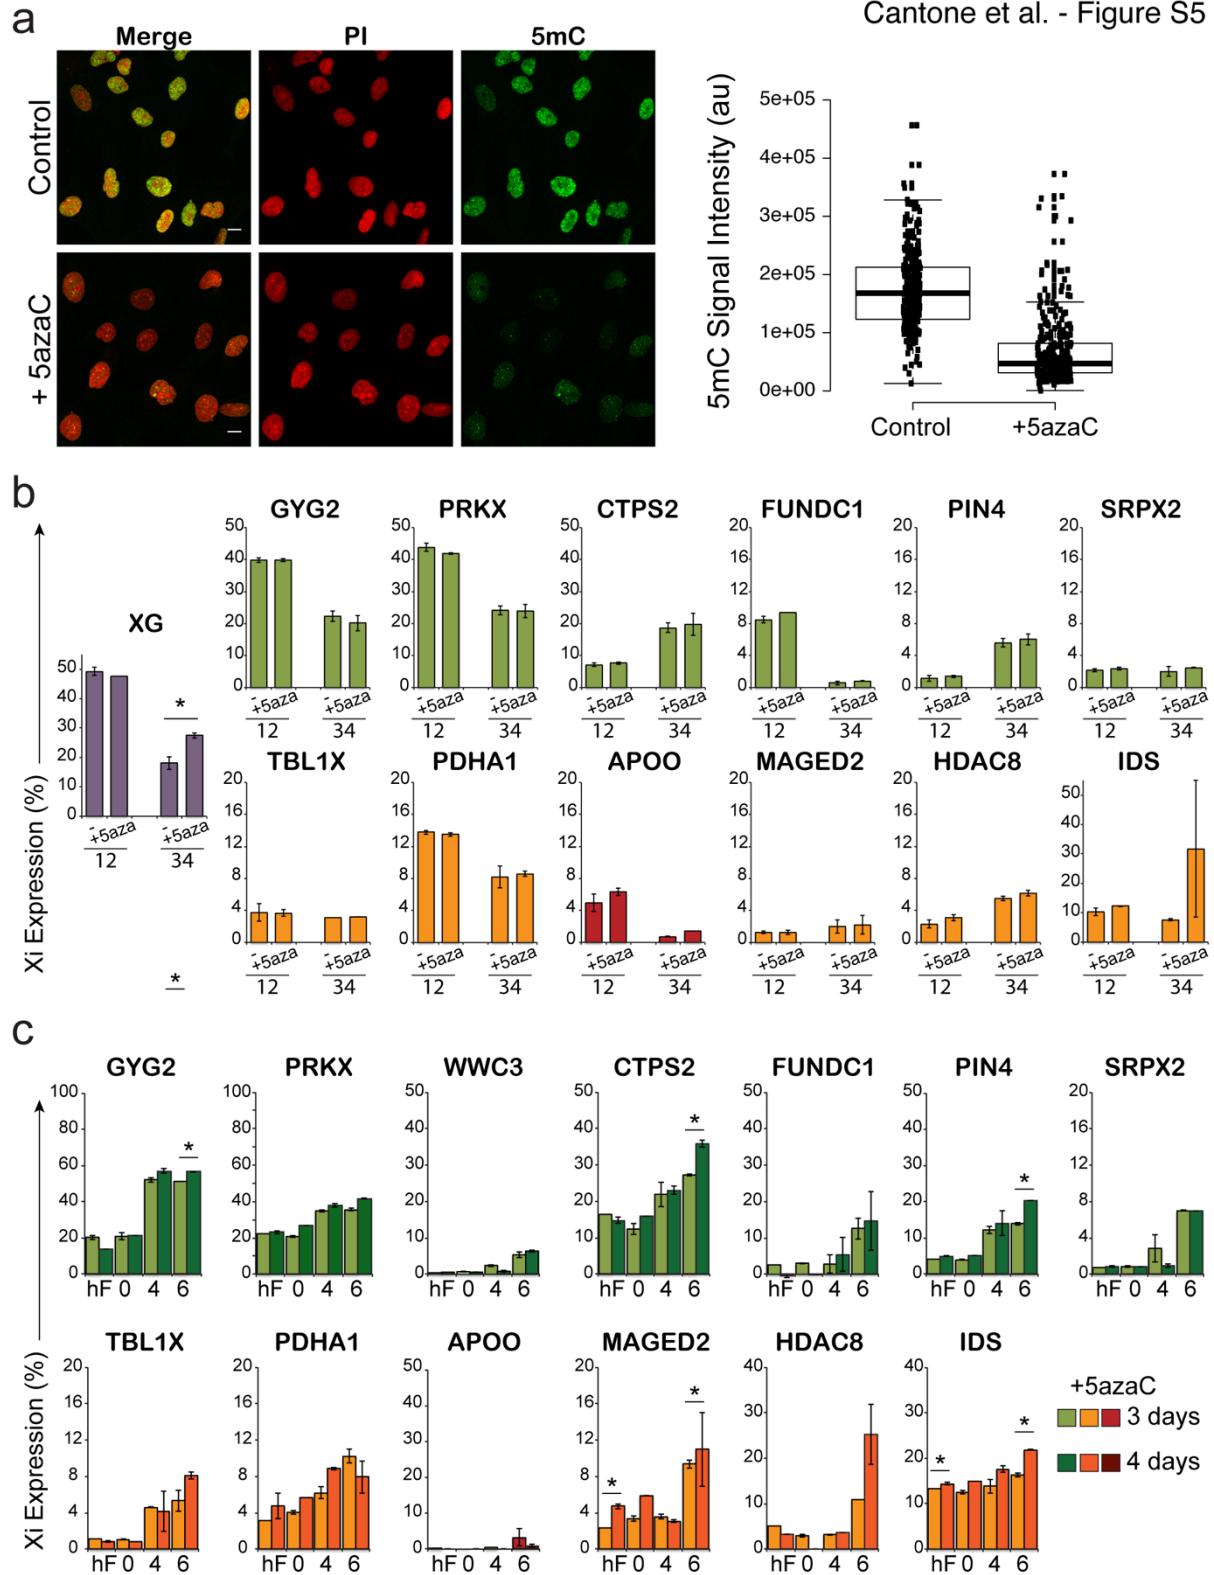

**Figure S5. DNA demethylation does not induce reactivation of stochastically expressed Xi genes ahead of reprogramming.** (a) Confocal images show 5-methyl-cytosine (5mC) immunofluorescence and DNA staining (Propidium Iodide, PI) of human fibroblasts that were cultured for 3 days in the presence of 1  $\mu$ M 5-deoxy-azacytidine (+5azaC) or were untreated (control). Box plots on the right show

5mC intensity density across nuclei of 5azaC treated (n=302) and control (n=254) cells. **(b)** Xi gene expression in hF clone 12 and 34 after culture for 3 days in the presence (+5azaC) or absence of 5-deoxy-azacytidine. Data represent the average of 2 independent experiments  $\pm$  SEM for each clone. Asterisks (\*) marks significant differences ( $p \leq 0.05$ , two-sided t-test). **(c)** Xi allelic expression in hF clone 34 treated for 3 or 4 days with 5azaC and then reprogrammed by fusion with mESCs. Data represent the average of 2 independent experiments  $\pm$  SEM for each clone. Asterisks (\*) marks significant differences ( $p \leq 0.05$ , two-sided t-test).



## Supplemental References

1. Harvey CT, Moyerbrailean GA, Davis GO, Wen X, Luca F, Pique-Regi R: **QuASAR: quantitative allele-specific analysis of reads.** *Bioinformatics* 2015, **31**:1235-1242.
2. Huang da W, Sherman BT, Lempicki RA: **Systematic and integrative analysis of large gene lists using DAVID bioinformatics resources.** *Nat Protoc* 2009, **4**:44-57.
3. Gerstein MB, Kundaje A, Hariharan M, Landt SG, Yan KK, Cheng C, Mu XJ, Khurana E, Rozowsky J, Alexander R, et al: **Architecture of the human regulatory network derived from ENCODE data.** *Nature* 2012, **489**:91-100.
4. Takashima Y, Guo G, Loos R, Nichols J, Ficiz G, Krueger F, Oxley D, Santos F, Clarke J, Mansfield W, et al: **Resetting transcription factor control circuitry toward ground-state pluripotency in human.** *Cell* 2014, **158**:1254-1269.
5. Dixon JR, Selvaraj S, Yue F, Kim A, Li Y, Shen Y, Hu M, Liu JS, Ren B: **Topological domains in mammalian genomes identified by analysis of chromatin interactions.** *Nature* 2012, **485**:376-380.
6. Kelkar A, Thakur V, Ramaswamy R, Deobagkar D: **Characterisation of inactivation domains and evolutionary strata in human X chromosome through Markov segmentation.** *PLoS One* 2009, **4**:e7885.
7. Nozawa RS, Nagao K, Igami KT, Shibata S, Shirai N, Nozaki N, Sado T, Kimura H, Obuse C: **Human inactive X chromosome is compacted through a PRC2-independent SMCHD1-HBiX1 pathway.** *Nat Struct Mol Biol* 2013, **20**:566-573.
